# Supplementary material
Source: publisher site journal article supplement (http://kjim.org/upload/media/kjim-2020-039-suppl2.pdf)
Supplement: Supplementary file 1 [file kjim-2020-039-suppl2.pdf]

**Supplementary Table 2 Predictors at diagnosis for ESRD during follow-up in non-elderly AAV patients (n = 124)**

| Variable                                    | Univariable |               |         | Multivariable |              |         |
|---------------------------------------------|-------------|---------------|---------|---------------|--------------|---------|
|                                             | HR          | 95% CI        | p value | HR            | 95% CI       | p value |
| <b>Demographic data at diagnosis</b>        |             |               |         |               |              |         |
| Age                                         | 1.028       | 0.985–1.073   | 0.207   |               |              |         |
| Female sex                                  | 1.321       | 0.429–4.067   | 0.628   |               |              |         |
| Variants (MPA vs. GPA or EGPA) at diagnosis | 2.647       | 0.926–7.562   | 0.069   |               |              |         |
| <b>ANCA positivity at diagnosis</b>         |             |               |         |               |              |         |
| MPO-ANCA (or P-ANCA)                        | 4.644       | 1.554–13.872  | 0.006   | 3.697         | 0.577–23.680 | 0.168   |
| PR3-ANCA (or C-ANCA)                        | 0.929       | 0.301–2.867   | 0.898   |               |              |         |
| <b>AAV-specific indices at diagnosis</b>    |             |               |         |               |              |         |
| BVAS, $\geq 18$                             | 2.725       | 1.025–7.242   | 0.044   | 0.626         | 0.114–3.421  | 0.589   |
| FFS, $\geq 2$                               | 3.349       | 1.269–8.839   | 0.015   | 6.875         | 1.168–40.470 | 0.033   |
| <b>Clinical manifestations at diagnosis</b> |             |               |         |               |              |         |
| General                                     | 1.066       | 0.405–2.804   | 0.898   |               |              |         |
| Cutaneous                                   | 0.389       | 0.123–1.234   | 0.109   |               |              |         |
| Muco-membranous /Ocular                     | 0.036       | 0.000–14.645  | 0.278   |               |              |         |
| Ear nose throat                             | 0.281       | 0.080–0.984   | 0.047   | 0.289         | 0.054–1.534  | 0.145   |
| Pulmonary                                   | 2.676       | 0.980–7.305   | 0.055   |               |              |         |
| Cardiovascular                              | 2.197       | 0.842–5.729   | 0.108   |               |              |         |
| Gastrointestinal                            | 0.552       | 0.073–4.171   | 0.565   |               |              |         |
| Renal                                       | 23.159      | 2.891–185.545 | 0.003   | 4.746         | 0.349–64.592 | 0.242   |
| Nervous                                     | 0.211       | 0.048–0.930   | 0.040   | 0.084         | 0.007–0.964  | 0.047   |
| <b>Laboratory results at diagnosis</b>      |             |               |         |               |              |         |
| White blood cell count                      | 1.000       | 1.000–1.000   | 0.261   |               |              |         |
| Haemoglobin                                 | 0.685       | 0.539–0.870   | 0.002   | 0.752         | 0.450–1.257  | 0.277   |
| Platelet count                              | 0.998       | 0.993–1.002   | 0.316   |               |              |         |
| Fasting glucose                             | 1.013       | 1.005–1.021   | 0.001   | 1.028         | 1.009–1.046  | 0.003   |
| BUN                                         | 1.017       | 1.008–1.025   | < 0.001 | 0.979         | 0.953–1.006  | 0.119   |
| Creatinine                                  | 1.333       | 1.170–1.518   | < 0.001 | 2.093         | 1.275–3.435  | 0.004   |
| Total serum protein                         | 0.650       | 0.380–1.115   | 0.118   |               |              |         |
| Serum albumin                               | 0.970       | 0.504–1.869   | 0.929   |               |              |         |
| ALP                                         | 0.998       | 0.989–1.008   | 0.687   |               |              |         |
| AST                                         | 0.921       | 0.842–1.007   | 0.069   |               |              |         |
| ALT                                         | 0.955       | 0.903–1.010   | 0.106   |               |              |         |
| Total bilirubin                             | 0.165       | 0.010–2.799   | 0.212   |               |              |         |
| ESR                                         | 1.004       | 0.992–1.016   | 0.497   |               |              |         |
| CRP                                         | 1.003       | 0.993–1.014   | 0.539   |               |              |         |

AAV, antineutrophil cytoplasmic antibody (ANCA)-associated vasculitis; HR, hazard ratio; CI, confidence interval; MPA, microscopic polyangiitis; GPA, granulomatosis with polyangiitis; EGPA, eosinophilic granulomatosis with polyangiitis; MPO, myeloperoxidase; P, perinuclear; PR3, proteinase 3; C, cytoplasmic; BVAS, Birmingham Vasculitis Activity Score; FFS, five factor score; BUN, blood urea nitrogen; ALP, alkaline phosphatase; AST, aspartate transaminase; ALT, alanine transaminase; ESR, erythrocyte sedimentation rate; CRP C-reactive protein.
